# Supplementary material for: Discovering endometriosis biomarkers with multiplex cytokine arrays
Source: Clin Proteomics. 2019 Jul 11;16:28. doi: 10.1186/s12014-019-9248-y (PMC6621950; doi:10.1186/s12014-019-9248-y)
Supplement: Supplementary file 3 — Additional file 3. Supplemental Table S6. [file 12014_2019_9248_MOESM3_ESM.xlsx]

## Sheet: Table S6
Table S6. Number of Pubmed publications related to gynecological disorders characterized by inflammation
	Number of Pubmed publications *
Protein	Endometriosis	PID	PCOS	Pelvic Adhesion	STD	Fibroid	Uterine cancer	Ovarian cancer
6Ckine	5	0	0	0	18	0	3	8
CD14	30	25	6	3	683	2	31	60
CEACAM1	0	1	0	1	10	0	10	5
ENA78	0	0	0	0	0	0	0	0
ERBB3	2	0	2	0	0	0	19	61
IL7	1	1	0	0	51	0	2	0
ITAC	0	0	0	0	1	0	1	0
LAP	4	4	38	1	19	10	44	30
Lipocalin2	0	0	0	0	0	0	4	1
MCP1	4	1	2	1	11	1	2	5
NrCAM	0	0	1	0	0	0	1	2
RAGE	5	0	17	0	33	1	10	9
TARC	1	1	0	0	5	0	1	2
TNF-beta	52	16	22	4	335	5	82	89
* Publication titles listed in associated worksheets

## Sheet: Endometriosis
biomarker	# pubmed item	pubmed item titles
6Ckine	5	Analysis of Gene Expression in the Endocervical Epithelium of Women With Deep Endometriosis.PMID: 27004801 ; Addition of MCP-1 and MIP-3β to the IL-8 appraisal in peritoneal fluid enhances the probability of identifying women with endometriosis.PMID: 25704572 ; Transcriptional changes in the expression of chemokines related to natural killer and T-regulatory cells in patients with deep infiltrati…
CD14	30	CD33+ CD14+ CD11b+ HLA-DR- monocytic myeloid-derived suppressor cells recruited and activated by CCR9/CCL25 are crucial for the pathogenic progression of endometriosis.PMID: 30375700 ; Mesenchymal Stromal Cells Are More Immunosuppressive In Vitro If They Are Derived from Endometriotic Lesions than from Eutopic Endometrium.PMID: 29230250 ; Fas-Related Apoptosis of Peritoneal Fluid Macrophages in E…
CEACAM1	0
ENA78	0
ERBB3	2	Identification of Shared Molecular Signatures Indicate the Susceptibility of Endometriosis to Multiple Sclerosis.PMID: 29503661 ; The epidermal growth factor receptor critically regulates endometrial function during early pregnancy.PMID: 24945252
IL7	1	Treg and NK cells related cytokines are associated with deep rectosigmoid endometriosis and clinical symptoms related to the disease.PMID: 29477012 DOI: 10.1016/j.jri.2018.02.003
ITAC	0
LAP	4	The comorbidities of dysmenorrhea: a clinical survey comparing symptom profile in women with and without endometriosis.PMID: 30588070 ; Suppressive regulatory T cells and latent transforming growth factor-β-expressing macrophages are altered in the peritoneal fluid of patients with endometriosis.PMID: 29391020 ; [Role of a latent soluble TNF receptor type I (hsTNFRI) fusion protein in targeted tr…
Lipocalin2	0
MCP1	4	Discovery of non-invasive biomarkers for the diagnosis of endometriosis.PMID: 30992697 ; Redox regulation of microRNAs in endometriosis-associated pain.PMID: 28499250 ; Combination of CCR1 mRNA, MCP1, and CA125 measurements in peripheral blood as a diagnostic test for endometriosis.PMID: 19050323 ; Role of immunoreactions and mast cells in pathogenesis of human endometriosis--morphologic study an…
NrCAM	0
RAGE	5	Hypoxia, cytokines and stromal recruitment: parallels between pathophysiology of encapsulating peritoneal sclerosis, endometriosis and peritoneal metastasis.PMID: 30911653 ; High Expression of High-Mobility Group Box 1 in Menstrual Blood: Implications for Endometriosis.PMID: 29017437 ; Different effects of the immunomodulatory drug GMDP immobilized onto aminopropyl modified and unmodified mesopor…
TARC	1	Profiling of peritoneal fluid of women with endometriosis by chemokine protein array.PMID: 17357296
TNF-beta	52	Reduced inflammatory state promotes reinnervation of endometriotic-like lesions in TNFRp55 deficient mice.PMID: 31070761 ; Hypoxia, cytokines and stromal recruitment: parallels between pathophysiology of encapsulating peritoneal sclerosis, endometriosis and peritoneal metastasis.PMID: 30911653 ; IL-37 affects the occurrence and development of endometriosis by regulating the biological behavior of…

## Sheet: Pelvic inflammatory disease
biomarker	# pubmed item	pubmed item titles
6Ckine	0
CD14	25	Expression profiling of selected miRNAs in equine endometrium in response to LPS challenge in vitro: A new understanding of the inflammatory immune response.PMID: 30885304 ; Endocannabinoids as endometrial inflammatory markers in lactating Holstein cows.PMID: 29542183 ; Mesenchymal Stromal Cells Are More Immunosuppressive In Vitro If They Are Derived from Endometriotic Lesions than from Eutopic E…
CEACAM1	1	Specific Binding to Differentially Expressed Human Carcinoembryonic Antigen-Related Cell Adhesion Molecules Determines the Outcome of Neisseria gonorrhoeae Infections along the Female Reproductive Tract.PMID: 29760215 PMCID: PMC6056862 DOI: 10.1128/IAI.00092-18
ENA78	0
ERBB3	0
IL7	1	IL17 Mediates Pelvic Pain in Experimental Autoimmune Prostatitis (EAP).PMID: 25933188 PMCID: PMC4416802 DOI: 10.1371/journal.pone.0125623
ITAC	0
LAP	4	Comparison of diagnostic performance between single- and multiphasic contrast-enhanced abdominopelvic computed tomography in patients admitted to the emergency department with abdominal pain: potential radiation dose reduction.PMID: 25424561 ; Endometrial epithelial cells are potent producers of tracheal antimicrobial peptide and serum amyloid A3 gene expression in response to E. coli stimulation…
Lipocalin2	0
MCP1	1	Quercetin protects against chronic prostatitis in rat model through NF-κB and MAPK signaling pathways.PMID: 29654614 DOI: 10.1002/pros.23536
NrCAM	0
RAGE	0
TARC	1	Inhibitory effect of Patrinia scabiosifolia Link on the development of atopic dermatitis-like lesions in human keratinocytes and NC/Nga mice.PMID: 28347830 DOI: 10.1016/j.jep.2017.03.045
TNF-beta	16	Gut microbial dysbiosis is associated with development and progression of radiation enteritis during pelvic radiotherapy.PMID: 30908851 ; Anti-inflammatory effect of Man-Pen-Fang, a Chinese herbal compound, on chronic pelvic inflammation in rats.PMID: 28652014 ; Lactobacillus rhamnosus GR-1 Limits Escherichia coli-Induced Inflammatory Responses via Attenuating MyD88-Dependent and MyD88-Independen…

## Sheet: Polycystic ovarian syndrome
biomarker	# pubmed item	pubmed item titles
6Ckine	0
CD14	6	Elevated CD14++CD16+ Monocytes in Hyperhomocysteinemia-Associated Insulin Resistance in Polycystic Ovary Syndrome.PMID: 29439619 ; Endometrial stromal fibroblasts from women with polycystic ovary syndrome have impaired progesterone-mediated decidualization, aberrant cytokine profiles and promote enhanced immune cell migration in vitro.PMID: 25750105 ; Low-grade chronic inflammation in the periphe…
CEACAM1	0
ENA78	0
ERBB3	2	Women-specific risk factors for heart failure: A genetic approach.PMID: 29452776 ; Causal mechanisms and balancing selection inferred from genetic associations with polycystic ovary syndrome.PMID: 26416764
IL7	0
ITAC	0
LAP	38	Body fat indices as effective predictors of insulin resistance in obese/non-obese polycystic ovary syndrome women in the Southwest of China.PMID: 30924083 ; Association Between Vitamin D and Adrenal Parameters with Metabolic and Inflammatory Markers in Polycystic Ovary Syndrome.PMID: 30850700 ; Polycystic Ovary Syndrome is Associated with Elevated Periostin Levels.PMID: 30372763 ; The impact of l…
Lipocalin2	0
MCP1	2	Letrozole vs estradiol valerate induced PCOS in rats: glycemic, oxidative and inflammatory status assessment.PMID: 26792865 ; Endometrial stromal fibroblasts from women with polycystic ovary syndrome have impaired progesterone-mediated decidualization, aberrant cytokine profiles and promote enhanced immune cell migration in vitro.PMID: 25750105
NrCAM	1	Attenuated expression of MTR in both prenatally androgenized mice and women with the hyperandrogenic phenotype of PCOS.PMID: 29232372 PMCID: PMC5726624 DOI: 10.1371/journal.pone.0187427
RAGE	17	Implications and Future Perspectives of AGEs in PCOS Pathophysiology.PMID: 30712978 ; Vitamin D attenuates the effect of advanced glycation end products on anti-Mullerian hormone signaling.PMID: 30253183 ; A network pharmacology approach to explore the mechanisms of Erxian decoction in polycystic ovary syndrome.PMID: 30181771 ; Advanced glycation end products interfere in luteinizing hormone and …
TARC	0
TNF-beta	22	Effect of probiotic and synbiotic supplementation on inflammatory markers in health and disease status: A systematic review and meta-analysis of clinical trials.PMID: 31060892 ; Exercise-induced anti-inflammatory effects in overweight/obese women with polycystic ovary syndrome.PMID: 31005728 ; The Effects of Selenium Supplementation on Clinical Symptoms and Gene Expression Related to Inflammation…

## Sheet: pelvic adhesion
biomarker	# pubmed item	pubmed item titles
6Ckine	0
CD14	3	CRISPLD2 is a target of progesterone receptor and its expression is decreased in women with endometriosis.PMID: 24955763 ; Is endometriosis associated with systemic subclinical inflammation?PMID: 16679772 ; Coordinated but depressed expression of human leukocyte antigen-DR, intercellular adhesion molecule-1, and CD14 on peritoneal macrophages in women with pelvic endometriosis.PMID: 14505752
CEACAM1	1	Specific Binding to Differentially Expressed Human Carcinoembryonic Antigen-Related Cell Adhesion Molecules Determines the Outcome of Neisseria gonorrhoeae Infections along the Female Reproductive Tract.PMID: 29760215 PMCID: PMC6056862 DOI: 10.1128/IAI.00092-18
ENA78	0
ERBB3	0
IL7	0
ITAC	0
LAP	1	Single-Site Robot-Assisted Laparoscopic Staging Surgery for Presumed Clinically Early-Stage Ovarian Cancer.PMID: 28911827 DOI: 10.1016/j.jmig.2017.09.005
Lipocalin2	0
MCP1	1	Discovery of non-invasive biomarkers for the diagnosis of endometriosis.PMID: 30992697 PMCID: PMC6451201 DOI: 10.1186/s12014-019-9235-3
NrCAM	0
RAGE	0
TARC	0
TNF-beta	4	Increased peritoneal and endometrial gene expression of biologically relevant cytokines and growth factors during the menstrual phase in women with endometriosis.PMID: 16759923 ; [Expression of markers of immunocompetent cells, cytokine level, and L-arginine metabolism in complex extremely high frequency and interferon therapy of inflammatory diseases in women of highlands].PMID: 12918255 ; Perit…

## Sheet: Sexually transmitted disease
biomarker	# pubmed item	pubmed item titles
6Ckine	18	Novel DNA Aptamers Against CCL21 Protein: Characterization and Biomedical Applications for Targeted Drug Delivery to T Cell-Rich Zones.PMID: 29733244 ; Cytokines Elevated in HIV Elite Controllers Reduce HIV Replication In Vitro and Modulate HIV Restriction Factor Expression.PMID: 28053103 ; Progesterone Levels Associate with a Novel Population of CCR5+CD38+ CD4 T Cells Resident in the Genital Muc…
CD14	683	Chlamydia trachomatis Lipopolysaccharide Evades the Canonical and Noncanonical Inflammatory Pathways To Subvert Innate Immunity.PMID: 31015326 ; Alterations in bacterial communities, SCFA and biomarkers in an elderly HIV-positive and HIV-negative population in western Mexico.PMID: 30845929 ; Effects of Tobacco Usage and Antiretroviral Therapy on Biomarkers of Systemic Immune Activation in HIV-Inf…
CEACAM1	10	[Immunological mechanisms of Neisseria gonorrhoeae infection: An update].PMID: 30171763 ; Specific Binding to Differentially Expressed Human Carcinoembryonic Antigen-Related Cell Adhesion Molecules Determines the Outcome of Neisseria gonorrhoeae Infections along the Female Reproductive Tract.PMID: 29760215 ; Selection for a CEACAM receptor-specific binding phenotype during Neisseria gonorrhoeae i…
ENA78	0
ERBB3	0
IL7	51	CD32 expression is associated to T-cell activation and is not a marker of the HIV-1 reservoir.PMID: 30013105 ; [Moxibustion combined with highly active antiretroviral therapy for CD4+ and γ chain cytokines of HIV infected patients].PMID: 29354928 ; Is weak CD4+ gain in the course of suppressive combination antiretroviral therapy for HIV infection a current clinical challenge? A case report and br…
ITAC	1	Differential expression of RDC1/CXCR7 in the human placenta.PMID: 18956235 DOI: 10.1007/s10875-008-9258-4
LAP	19	Lipid accumulation product index in HIV-infected patients: a marker of cardiovascular risk.PMID: 29684319 ; Laser Adjuvant-Assisted Peptide Vaccine Promotes Skin Mobilization of Dendritic Cells and Enhances Protective CD8+ TEM and TRM Cell Responses against Herpesvirus Infection and Disease.PMID: 29437976 ; Genital Tract Infections in an Isolated Community: 100 Women of the Príncipe Island.PMID: …
Lipocalin2	0
MCP1	11	Effects of depot-medroxyprogesterone acetate on the immune microenvironment of the human cervix and endometrium: implications for HIV susceptibility.PMID: 28051087 ; High Levels of Inflammatory Cytokines in the Reproductive Tract of Women with BV and Engaging in Intravaginal Douching: A Cross-Sectional Study of Participants in the Women Interagency HIV Study.PMID: 27897054 ; Placental Micropartic…
NrCAM	0
RAGE	33	The cursed duet today: Tuberculosis and HIV-coinfection.PMID: 28256380 ; High Mobility Group Box 1 Protein Enhances HIV Replication in Newly Infected Primary T Cells.PMID: 28164548 ; Soluble Levels of Receptor for Advanced Glycation Endproducts (RAGE) and Progression of Atherosclerosis in Individuals Infected with Human Immunodeficiency Virus: ACTG NWCS 332.PMID: 27216802 ; Complement Component 3…
TARC	5	Stromal Fibroblasts Drive Host Inflammatory Responses That Are Dependent on Chlamydia trachomatis Strain Type and Likely Influence Disease Outcomes.PMID: 30890604 ; [Circulating levels of Th1- and Th2-chemokines increase in patients with early syphilis].PMID: 28274320 ; Which adherence measure - self-report, clinician recorded or pharmacy refill - is best able to predict detectable viral load in …
TNF-beta	335	The effects of highly active antiretroviral therapy on the serum levels of pro-inflammatory and anti-inflammatory cytokines in HIV infected subjects.PMID: 30501642 ; Hydroxypropyl-Beta-Cyclodextrin Reduces Inflammatory Signaling from Monocytes: Possible Implications for Suppression of HIV Chronic Immune Activation.PMID: 30404938 ; Correlation between PAI-1, leptin and ferritin with HOMA in HIV/AI…

## Sheet: Uterine fibroid
biomarker	# pubmed item	pubmed item titles
6Ckine	0
CD14	2	Lipopolysaccharide activated TLR4/NF-κB signaling pathway of fibroblasts from uterine fibroids.PMID: 26617709 ; Flow cytometric evaluation of intracellular cytokine synthesis in peripheral mononuclear cells of women with endometriosis.PMID: 18214799
CEACAM1	0
ENA78	0
ERBB3	0
IL7	0
ITAC	0
LAP	10	Clinical outcomes and health care utilization pre- and post-laparoscopic radiofrequency ablation of symptomatic fibroids and laparoscopic myomectomy: a randomized trial of uterine-sparing techniques (TRUST) in Canada.PMID: 29670382 ; What is the Future of Open Intraperitoneal Power-Morcellation of Fibroids?PMID: 26670834 ; A novel application of the Lap Loop system in day case laparoscopic myomec…
Lipocalin2	0
MCP1	1	Induction of circulating monocyte chemoattractant protein-1 in women with gonadotropin-releasing hormone agonist.PMID: 21726903 DOI: 10.1016/j.jri.2011.04.011
NrCAM	0
RAGE	1	Randomised trial of two embolic agents for uterine artery embolisation for fibroids: Gelfoam versus Embospheres (RAGE trial).PMID: 30687808 PMCID: PMC6325089 DOI: 10.1186/s42155-018-0044-y
TARC	0
TNF-beta	5	Extracellular matrix in uterine leiomyoma pathogenesis: a potential target for future therapeutics.PMID: 29186429 ; [Tumor necrosis factor in uterine leiomyomas at various stages of tumor growth].PMID: 20695192 ; Uterine cavity matrix metalloproteinases and cytokines in patients with leiomyoma, adenomyosis or endometrial polyp.PMID: 14597251 ; Lymphotoxin production by regional lymph node lymphoc…

## Sheet: Uterine cancer
biomarker	# pubmed item	pubmed item titles
6Ckine	3	Synergistic effect of programmed cell death protein 1 blockade and secondary lymphoid tissue chemokine in the induction of anti-tumor immunity by a therapeutic cancer vaccine.PMID: 27699512 ; Dendritic cells primed with HPV positive cervical tumor lysate are superior to unprimed DCs in migratory capacity and induce a potent Th1 response.PMID: 25315748 ; Reduced local immunity in HPV-related VIN: …
CD14	31	Diagnostic and prognostic relevance of microparticles in peripheral and uterine blood of patients with endometrial cancer.PMID: 30618036 ; Influence of ovarian cancer type I and type II microenvironment on the phenotype and function of monocyte-derived dendritic cells.PMID: 28589429 ; Prognostic effect of different PD-L1 expression patterns in squamous cell carcinoma and adenocarcinoma of the cer…
CEACAM1	10	CD66 and CD49f expressing cells are associated with distinct neoplastic phenotypes and progression in human cervical cancer.PMID: 27132080 ; CD66+ cells in cervical precancers are partially differentiated progenitors with neoplastic traits.PMID: 25267065 ; Notch signaling in CD66+ cells drives the progression of human cervical cancers.PMID: 21646470 ; Impact of p53 immunostaining in predicting ad…
ENA78	0
ERBB3	19	Phosphatidylinositol 3-kinase pathway genomic alterations in 60,991 diverse solid tumors informs targeted therapy opportunities.PMID: 30582752 ; Response to ERBB3-Directed Targeted Therapy in NRG1-Rearranged Cancers.PMID: 29610121 ; Macrophage infiltration and genetic landscape of undifferentiated uterine sarcomas.PMID: 28570276 ; Integrated genomic and molecular characterization of cervical canc…
IL7	2	Intravaginal Administration of Fc-Fused IL7 Suppresses the Cervicovaginal Tumor by Recruiting HPV DNA Vaccine-Induced CD8 T Cells.PMID: 27407095 ; The use of novel technology-based weight loss interventions for obese women with endometrial hyperplasia and cancer.PMID: 26644265
ITAC	1	[Current Recommendations for the Prevention and Treatment of Venous Thromboembolism in Cancer Patients].PMID: 28397505 DOI: 10.14735/amko2017100
LAP	44	Genital Tract Infections in an Isolated Community: 100 Women of the Príncipe Island.PMID: 29259388 ; Impact of histology and surgical approach on survival among women with early-stage, high-grade uterine cancer: An NRG Oncology/Gynecologic Oncology Group ancillary analysis.PMID: 27743738 ; Bacterial vaginosis, aerobic vaginitis, vaginal inflammation and major Pap smear abnormalities.PMID: 2681006…
Lipocalin2	4	Overexpression of lipocalin 2 in human cervical cancer enhances tumor invasion.PMID: 26840566 ; Lipocalin2 enhances the matrix metalloproteinase-9 activity and invasion of extravillous trophoblasts under hypoxia.PMID: 23972287 ; Immunohistochemical detection of a specific receptor for lipocalin2 (solute carrier family 22 member 17, SLC22A17) and its prognostic significance in endometrial carcinom…
MCP1	2	Endometrial stromal fibroblasts from women with polycystic ovary syndrome have impaired progesterone-mediated decidualization, aberrant cytokine profiles and promote enhanced immune cell migration in vitro.PMID: 25750105 ; Induction of circulating monocyte chemoattractant protein-1 in women with gonadotropin-releasing hormone agonist.PMID: 21726903
NrCAM	1	Multi‑layered prevention and treatment of chronic inflammation, organ fibrosis and cancer associated with canonical WNT/β‑catenin signaling activation (Review).PMID: 29786110 PMCID: PMC6034925 DOI: 10.3892/ijmm.2018.3689
RAGE	10	Patient Characteristics, Early Outcomes, and Implementation Lessons of Cervical Cancer Treatment Services in Rural Rwanda.PMID: 30582433 ; Impact of the Receptor for Advanced Glycation End Products Genetic Polymorphisms on the Progression in Uterine Cervical Cancer.PMID: 30410591 ; S100A7 promotes the migration, invasion and metastasis of human cervical cancer cells through epithelial-mesenchymal…
TARC	1	Transanal Assisted Resection with Closure of Anal Canal for Lower Rectal Diseases.PMID: 28982899 DOI: 10.21873/anticanres.12017
TNF-beta	82	Genetic Susceptibility for Cervical Cancer in African Populations: What Are the Host Genetic Drivers?PMID: 30004844 ; Extracellular matrix in uterine leiomyoma pathogenesis: a potential target for future therapeutics.PMID: 29186429 ; Imperatorin efficiently blocks TNF-α-mediated activation of ROS/PI3K/Akt/NF-κB pathway.PMID: 28440462 ; KPNB1-mediated nuclear import is required for motility and in…

## Sheet: Ovarian cancer
biomarker	# pubmed item	pubmed item titles
6Ckine	8	Chemokine Network and Overall Survival in TP53 Wild-Type and Mutant Ovarian Cancer.PMID: 30181917 ; Associations between self-reported diabetes and 78 circulating markers of inflammation, immunity, and metabolism among adults in the United States.PMID: 28753646 ; Serum expression level of cytokine and chemokine correlates with progression of human ovarian cancer.PMID: 29767861 ; The essential rol…
CD14	60	M2-like tumor-associated macrophages-secreted EGF promotes epithelial ovarian cancer metastasis via activating EGFR-ERK signaling and suppressing lncRNA LIMT expression.PMID: 31062668 ; Translational research aiming to improve survival of ovarian tissue transplants using adipose tissue-derived stem cells.PMID: 30891730 ; The blood mMDSC to DC ratio is a sensitive and easy to assess independent pr…
CEACAM1	5	Prognostic Impact of CEACAM1 in Node-Negative Ovarian Cancer Patients.PMID: 30050594 ; Carcinoembryonic antigen-related cell adhesion molecule 1 is expressed and as a function histotype in ovarian tumors.PMID: 26653024 ; Prediagnostic serum biomarkers as early detection tools for pancreatic cancer in a large prospective cohort study.PMID: 24747429 ; Expression pattern of osteopontin in endometria…
ENA78	0
ERBB3	61	HER3-Targeted Affibodies with Optimized Formats Reduce Ovarian Cancer Progression in a Mouse Xenograft Model.PMID: 30949858 ; Distinct expression and prognostic value of members of the epidermal growth factor receptor family in ovarian cancer.PMID: 30588099 ; Response to ERBB3-Directed Targeted Therapy in NRG1-Rearranged Cancers.PMID: 29610121 ; Design of cyclic and d-amino acids containing pepti…
IL7	0
ITAC	0
LAP	30	Potential effect of tumor-specific Treg-targeted antibodies in the treatment of human cancers: A bioinformatics analysis.PMID: 29308313 ; Single-Site Robot-Assisted Laparoscopic Staging Surgery for Presumed Clinically Early-Stage Ovarian Cancer.PMID: 28911827 ; Minimal access surgery compared to laparotomy for secondary surgical cytoreduction in patients with recurrent ovarian carcinoma: Perioper…
Lipocalin2	1	Lipocalin2 expressions correlate significantly with tumor differentiation in epithelial ovarian cancer.PMID: 19188485 PMCID: PMC2675069 DOI: 10.1369/jhc.2009.953257
MCP1	5	Relationship between MCP1 (-2518A>G) gene variants and ovarian cancer in Turkish population.PMID: 28886321 ; Adrenergic regulation of monocyte chemotactic protein 1 leads to enhanced macrophage recruitment and ovarian carcinoma growth.PMID: 25738355 ; Cucurbit[7]uril encapsulated cisplatin overcomes cisplatin resistance via a pharmacokinetic effect.PMID: 22610518 ; p53 autoantibodies, cytokine le…
NrCAM	2	Gene expression signatures differentiate ovarian/peritoneal serous carcinoma from breast carcinoma in effusions.PMID: 20132413 ; A new method for one-step, no-carrier-added synthesis of cholesteryl 4-[18F]-fluorobenzoate ([18F]-CFB), a radiotracer used in detection of adrenal malignancies.PMID: 10954681
RAGE	9	Overexpression of receptor for advanced glycation end products (RAGE) in ovarian cancer.PMID: 27814276 ; S100B Mediates Stemness of Ovarian Cancer Stem-Like Cells Through Inhibiting p53.PMID: 27501952 ; Expression pattern of RAGE and IGF-1 in the human fetal ovary and ovarian serous carcinoma.PMID: 25724694 ; Polymorphisms of receptor for advanced glycation end products and risk of epithelial ova…
TARC	2	Cigarette smoking and variations in systemic immune and inflammation markers.PMID: 25274579 ; Circulating inflammation markers and prospective risk for lung cancer.PMID: 24249745
TNF-beta	89	Human papilloma virus and breast cancer: the role of inflammation and viral expressed proteins.PMID: 30642295 ; INH14, a Small-Molecule Urea Derivative, Inhibits the IKKα/β-Dependent TLR Inflammatory Response.PMID: 30447158 ; IL-21-secreting hUCMSCs combined with miR-200c inhibit tumor growth and metastasis via repression of Wnt/β-catenin signaling and epithelial-mesenchymal transition in epithel…
